# Supplementary material
Source: PubMed Central journal article supplement (PMC2658076)
Supplement: M809332200_1.pdf [file M809332200_1.pdf]

**SUPPLEMENTAL FIGURE S1. Taniguchi *et al.***

-70: tacgactcac tatagggaga cccaagctgg ctagcgttta aacttaagct t<sup>KpnI</sup>ggtagcpgt gcgtccgccc <sup>Exon 1</sup>

---

1: ATGGCCGCCG CCGGCAGCT GTGCTTGCTC TACCTGTCGG CGGGGCTCCT GTCCCGGCTC GGCGCAGCCT  
 1: -M--A--A-- A--G--Q--L --C--L--L- -Y--L--S-- A--G--L--L --S--R--L- -G--A--A--

---

71: TCAACTTGGG CACTCGGGAG GACAACGTGA TCCGAAATA TGGAGACCCG GGGAGCCTCT TCGGCTTCTC  
 24: F--N--L--D --T--R--E- -D--N--V-- I--R--K--Y --G--D--P- -G--S--L-- F--G--F--S

---

**Exon 2**

---

141: GCTGGCCATG CACTGGCAAC TGCAGCCCGA GGACAAGCGG CTGTTGCTCG TGGGGGCCCC GCGCGGAGAA  
 48: --L--A--M- -H--W--Q-- L--Q--P--E --D--K--R- -L--L--L-- V--G--A--P --R--G--E--

---

211: GCGCTTCCAC TGCAGAGAGC CAACAGAACG GGAGGGCTGT ACAGCTGCGA CATCACCGCC CGGGGGCCAT  
 71: -A--L--P-- L--Q--R--A --N--R--T- -G--G--L-- Y--S--C--D --I--T--A- -R--G--P--

---

**Exon 3**

---

281: GCACGCGGAT CGAGTTTGAT AACGATGCTG ACCCCACGTC AGAAAGCAAG GAAGATCAGT GGATGGGGGT  
 94: C--T--R--I --E--F--D- -N--D--A-- D--P--T--S --E--S--K- -E--D--Q-- W--M--G--V

---

**Exon 4**

---

351: CACCGTCCAG AGCCAAGGTC CAGGGGGCAA GGTCTGACA TGTGCTCACC GATATGAAAA AAGGCAGCAT  
 118: --T--V--Q- -S--Q--G-- P--G--G--K --V--V--T- -C--A--H-- R--Y--E--K --R--Q--H--

---

421: GTTAATACGA AGCAGGAATC CCGAGACATC TTTGGGCGGT GTTATGTCCT GAGTCAGAAT CTCAGGATTG  
 141: -V--N--T-- K--Q--E--S --R--D--I- -F--G--R-- C--Y--V--L --S--Q--N- -L--R--I--

---

491: AAGACGATAT GGATGGGGGA GATTGGAGCT TTTGTGATGG GCGATTGAGA GGCCATGAGA AATTTGGCTC  
 164: E--D--D--M --D--G--G- -D--W--S-- F--C--D--G --R--L--R- -G--H--E-- K--F--G--S

---

561: TTGCCAGCAA GGTGTAGCAG CTACTTTTAC TAAAGACTTT CATTACATTG TATTTGGAGC CCCGGGTACT  
 188: --C--Q--Q- -G--V--A-- A--T--F--T --K--D--F- -H--Y--I-- V--F--G--A --P--G--T-

---

**Exon 6 (X2-coding region)**

---

631: TATAACTGGA AAGGCCTGCT GTTTTTGACC AGCGTTTCCT ATACAGATCC TGATCAGTTT GTTTATAAAA  
 211: -Y--N--W-- K--G--L--L --F--L--T- -S--V--S-- Y--T--D--P --D--Q--F- -V--Y--K--

---

**Exon 7**

---

701: CACGGCCTCC CCGGGAGCAG CCTGACACAT TCCCTGATGT GATGATGAAT AGCTACCTAG GTTTTTCTTT  
 234: T--R--P--P --R--E--Q- -P--D--T-- F--P--D--V --M--M--N- -S--Y--L-- G--F--S--L

---

771: GGACTCAGGG AAAGGTATTG TTTCTAAAGA TGAGATCACT TTTGTATCTG GTGCTCCCAG AGCCAATCAC  
 258: --D--S--G- -K--G--I-- V--S--K--D --E--I--T- -F--V--S-- G--A--P--R --A--N--H--

---

841: AGTGGAGCCG TGGTTTTGCT GAAGAGAGAC ATGAAGTCTG CACATCTCCT CCCTGAGCAC ATATTCGATG  
 281: -S--G--A-- V--V--L--L --K--R--D- -M--K--S-- A--H--L--L --P--E--H- -I--F--D--

---

**Exon 8**

---

911: GAGAAGGTCT GGCCTCTTCA TTTGGCTATG ATGTGGCGGT GGTGGACCTC AACAAAGGATG GGTGGCAAGA  
 304: G--E--G--L --A--S--S- -F--G--Y-- D--V--A--V --V--D--L- -N--K--D-- G--W--Q--D

---

**AccI**

---

981: TATAGTTATT GGAGCCCCAC AGTATTTTGA TAGAGATGGA GAAGTTGGAG GTGCAGTGTA T<sup>AccI</sup>GTCTACATG  
 328: --I--V--I- -G--A--P-- Q--Y--F--D --R--D--G- -E--V--G-- G--A--V--Y --V--Y--M--

---

1051: AACCAGCAAG GCAGA  
 351: -N--Q--Q-- G--R-

**Partial nucleotide and amino acid sequences of the putative human  $\alpha 6X2$  integrin subunit.** The nucleotide sequence of the putative  $\alpha 6X2$  subunit was assembled from the genomic sequence of the human integrin  $\alpha 6$  gene, based on information for the exon/intron boundaries of the gene (Ensembl transcript ID: ENST00000375221). The exon boundaries are indicated above the sequence. The nucleotide sequence is numbered from the first ATG sequence in exon 1. The nucleotides on the 5' side of exon 1 represent the vector-derived sequence. Amino acids encoded by the X2 exon (exon 6) are highlighted in *bold letters*. The recognition sequences for the restriction enzymes KpnI and AccI used for construction of the  $\alpha 6X2$  integrin expression vector are *boxed*.
